# Supplementary material for: Estimating return intervals for extreme climate conditions related to winter disasters and livestock mortality in Mongolia
Source: Copernicus journal article supplement (doi:10.5194/nhess-22-2751-2022), 2022-08-23
Supplement: Supplementary file 1 [file nhess-22-2751-2022-supplement.zip]

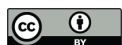

*Supplement of*

## **Estimating return intervals for extreme climate conditions related to winter disasters and livestock mortality in Mongolia**

**Masahiko Haraguchi et al.**

*Correspondence to:* Masahiko Haraguchi (mh2905@columbia.edu)

- nhess-22-2751-2022-supplement-title-page.pdf
- Supplement\_revision\_v5\_clean.docx

The copyright of individual parts of the supplement might differ from the article licence.
