# Supplementary material for: Estimating return intervals for extreme climate conditions related to winter disasters and livestock mortality in Mongolia
Source: Copernicus journal article supplement (doi:10.5194/nhess-22-2751-2022), 2022-08-23
Supplement: Supplementary file 2 [file nhess-22-2751-2022-supplement.zip]

Archive with 2 entries (2 files):
- nhess-22-2751-2022-supplement-title-page.pdf
- Supplement_revision_v5_clean.docx
