# Supplementary material for: Estimating return intervals for extreme climate conditions related to winter disasters and livestock mortality in Mongolia
Source: Copernicus journal article supplement (doi:10.5194/nhess-22-2751-2022), 2022-08-23
Supplement: Supplementary file 2 [file nhess-22-2751-2022-supplement.zip › Supplement_revision_v5_clean.docx]

# Supplement

# S1: How to select a threshold for GPD.

To fit a GPD, a threshold needs to be selected. We selected the thresholds in the following ways. Figure S.3 repeatedly fits the GPD to the data for a series of threshold choices along with uncertainty (Gilleland and Katz, 2016). Figure S.4 plots the mean excess values for a sequence of threshold choices with some variability information (Gilleland and Katz, 2016). As discussed in Gilleland and Katz (2016), choice of a threshold is subjective. Because a good choice of the threshold is near the inflection point of the right tail of the distribution, the value of 1.0 is selected as a threshold. This selection of 1 seems to yield estimates that will not change much as the threshold increases further from Figure S.3. Also, Gilleland and Katz (2016) suggests selecting a threshold whereby the graph is linear within uncertainty bounds in the plot of the mean excess values. Following this, the threshold value of 1 is a reasonable choice in Figure S.4. Furthermore, if I use this value for the threshold, the exceedance percentile of the threshold (a ratio of the number of exceedance to the number of total data) is 0.210 in the Southwest and 0.26 for both the northwest and east. These thresholds correspond to 4-5 years return periods. Setting these return levels as thresholds is of interest in terms of social concern. Therefore, it is reasonable to use a threshold of 1.0. In the same way, the threshold value of minus 23 degree is selected for the winter temperature Figure S.5 and Figure S.6, corresponding the 4-5 years return periods.

# S2: Local regression in Section 5

Please note that local Poisson regressions for the Southwest use alpha=0.5, for the Northwest alpha=0.5, and the East alpha=0.65 for smoothing parameters respectively. Local binomial regressions for the Southwest use alpha=0.5, for the Northwest alpha=0.8, and for East alpha=0.9. All are a 1 degree of freedom.

# S3: Figures


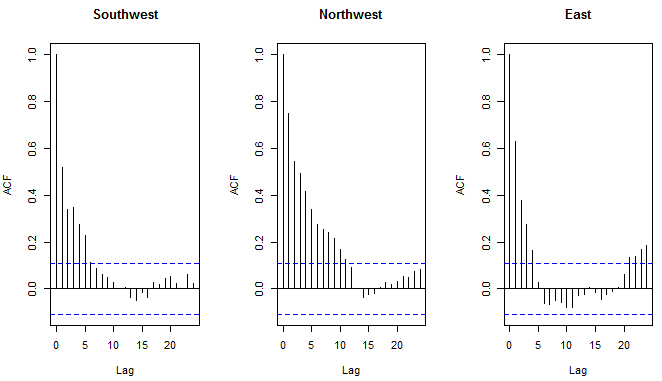


Figure S.1: ACF of the tree-ring reconstructed PDSI in each cluster.


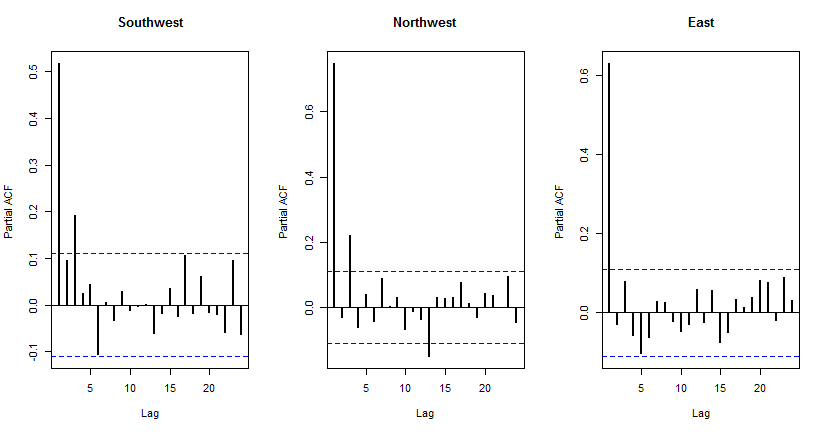


Figure S.2: PACF of the tree-ring reconstructed PDSI in each cluster.


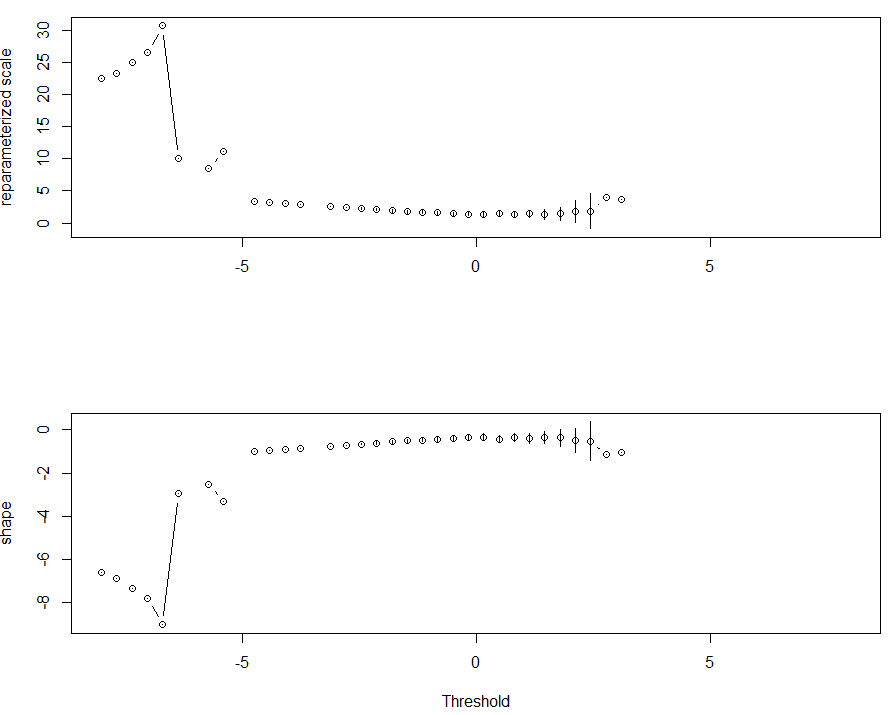


Figure S.3: Threshold Range Plot. This figure is used to choose a threshold for GPD following Gilleland and Katz (2016). The figure repeatedly fits the GP distribution function to the data to plot a sequence of threshold choices with some variability information. A subjective selection of 1 as a threshold appears to yield estimates that will not change much. Also, this selection is made based on Fig S4 and the theoretical and practical justification (which means that a threshold of 1 corresponds to a 4- 5 year return level, which is of social interests.) Reparametarization means here the scale parameter is adjusted so that it is not a function of threshold (Gilleland and Katz (2016)).


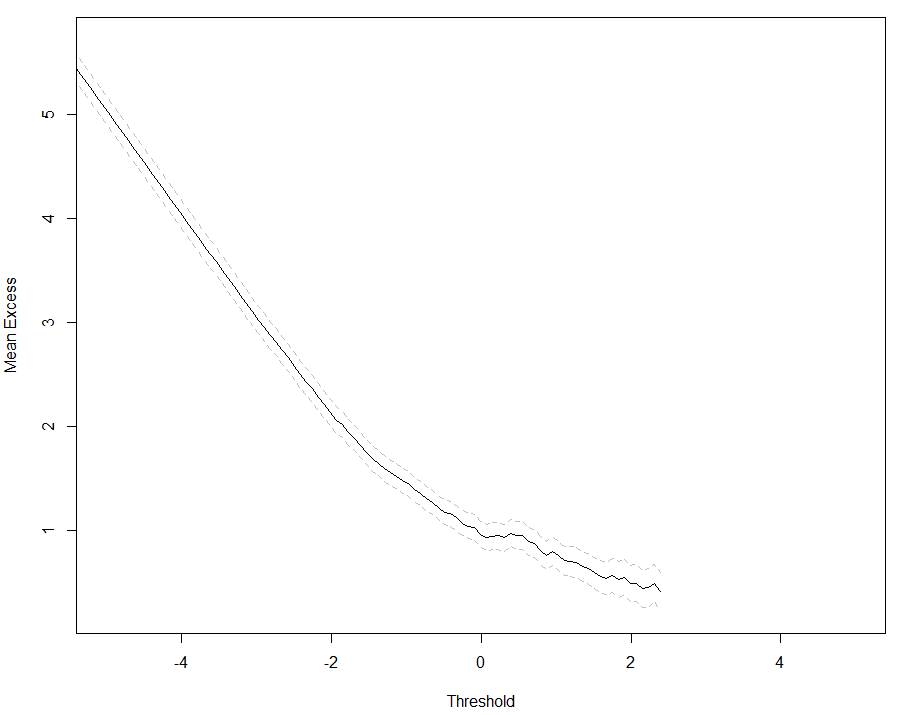


Figure S.: Empirical mean residual life plot to determine a threshold range of PDSI value in the Southwest. The inflection point is shown around 0-1. We subjectively select 1 as explained in Gilleland and Katz (2016).


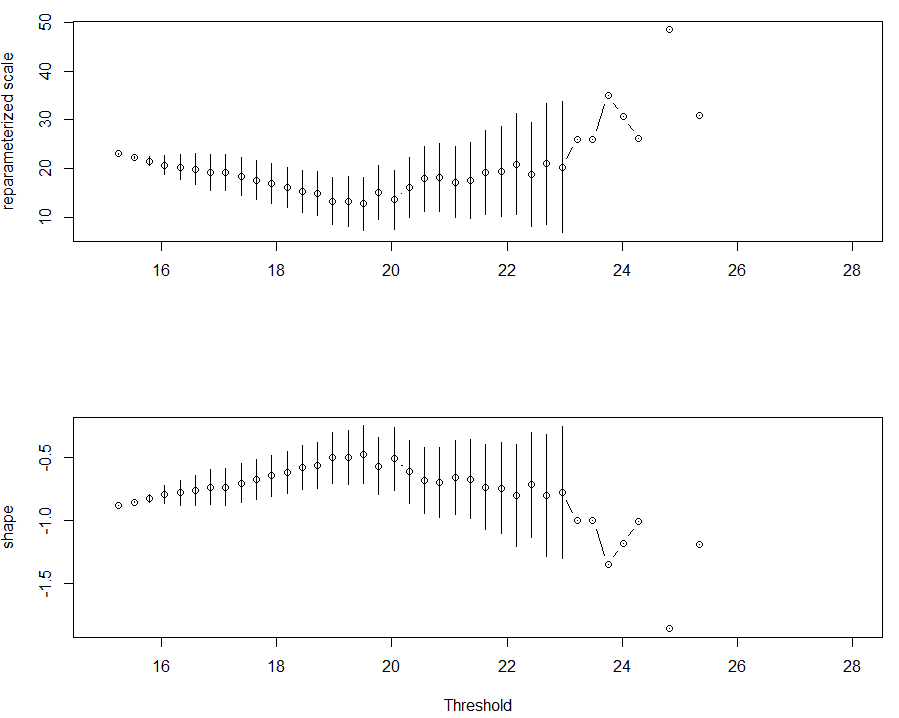


Figure S.: Threshold range plot of temperature in southwest. This figure is used to choose a threshold for GPD following Gilleland and Katz (2016).


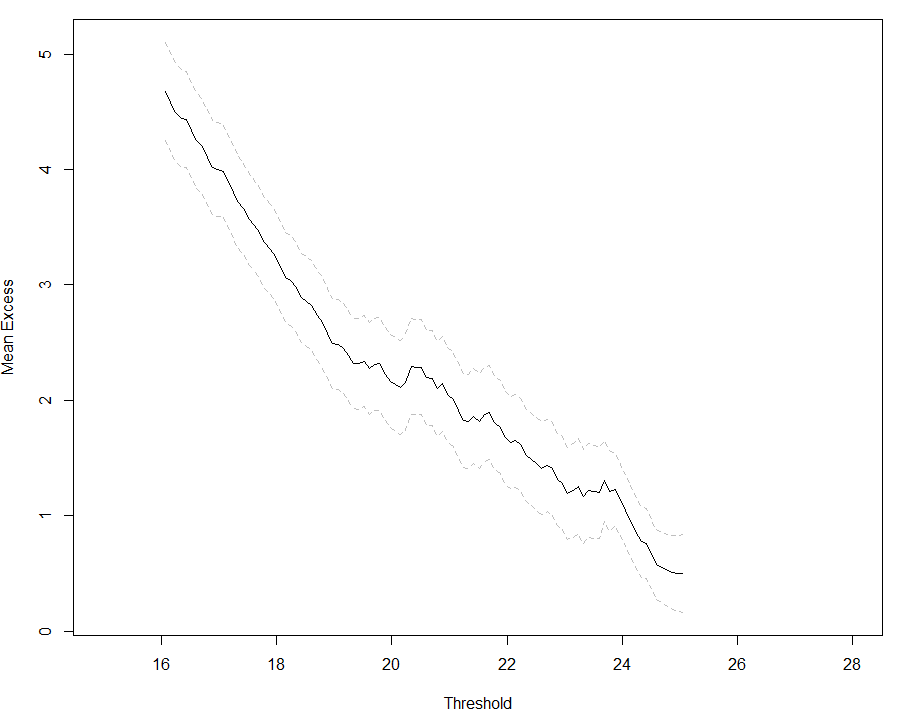


Figure S.: Empirical mean residual life plot to determine threshold range of temperature in southwest. The inflection point is shown around 23. We subjectively select 23 as explained in Gilleland and Katz (2016).


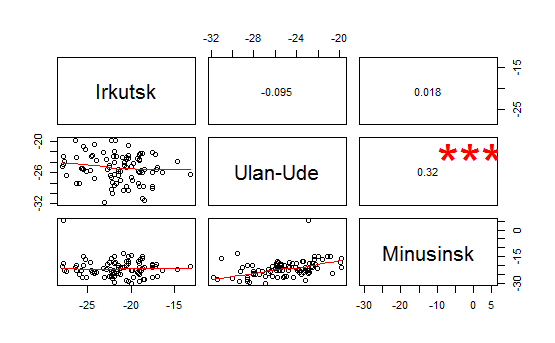


Figure S.7: Scatterplots between winter minimum temperature in three Siberia stations. Red marks show statistical significance, while red curves show the smoothed curve. One, two or three stars indicate that the corresponding variable is significant at 10%, 5% and 1% levels, respectively.


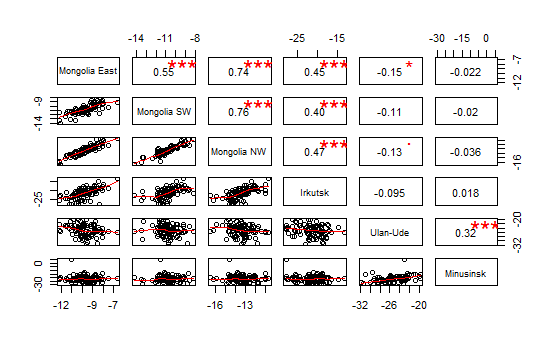


Figure S.8: Scatterplots of winter average temperature in three Siberia and three Mongolia clusters. One, two or three stars indicate that the corresponding variable is significant at 10%, 5% and 1% levels, respectively.


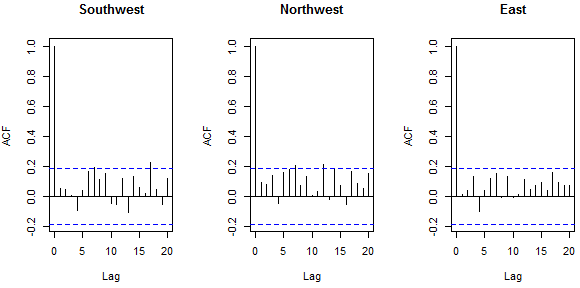


Figure S.9: ACF of residuals between data from Irkutsk Siberia and the winter average temperature of each cluster.

# A.3: Tables

**Table S.1: 95% Confidence intervals of parameters based on the normal approximation for each region.**

|  | 95% lower CI | Estimate | 95% upper CI |
| --- | --- | --- | --- |
| Southwest |  |  |  |
| Location (α0) | -0.56 | -0.42 | -0.28 |
| Scale (β0) | 0.75 | 0.95 | 1.15 |
| Scale (β1) | 0.001 | 0.002 | 0.003 |
| Shape (ε) | -0.29 | -0.23 | -0.17 |
| Northwest |  |  |  |
| Location(α0) | -0.87 | -0.67 | -0.46 |
| Scale (β0) | 1.53 | 1.68 | 1.82 |
| Shape (ε) | -0.32 | -0.25 | -0.18 |
| East |  |  |  |
| Location(α0) | -0.93 | -0.73 | -0.52 |
| Scale (β0) | 1.51 | 1.65 | 1.80 |
| Shape (ε) | -0.38 | -0.31 | -0.24 |

**Table S.2: 95% Confidence intervals of parameters, using other climate variables based on the normal approximation**

|  | 95% lower CI | Estimates | 95% Upper CI |
| --- | --- | --- | --- |
| Southwest |  |  |  |
| Location (α0) | 2.49 | 3.63 | 4.77 |
| Location (α1) | -0.18 | -0.14 | -0.11 |
| Scale (β0) | 0.96 | 1.12 | 1.28 |
| Shape(ε) | -0.33 | -0.21 | -0.10 |
| Northwest |  |  |  |
| Location (α0) | 4.84 | 6.25 | 7.67 |
| Location (α1) | -0.17 | -0.15 | -0.12 |
| Scale (β0) | 1.60 | 2.38 | 3.17 |
| Scale (β1) | -0.48 | -0.31 | -0.14 |
| Shape (ε) | -0.20 | -0.07 | 0.06 |
| East |  |  |  |
| Location (α0) | 3.01 | 5.09 | 7.17 |
| Location (α1) | -0.17 | -0.13 | -0.08 |
| Scale (β0) | 1.26 | 1.48 | 1.71 |
| Shape (ε) | -0.39 | -0.24 | -0.10 |

**Table S.3: 95% Confidence intervals of parameters, using other climate variables based on the normal approximation**

|  | 95% lower CI | Estimate | 95% upper CI |
| --- | --- | --- | --- |
| Southwest |  |  |  |
| Scale (β0) | 0.33 | 0.78 | 1.24 |
| Shape (ε) | -0.64 | -0.20 | 0.22 |
| Northwest |  |  |  |
| Scale (β0) | 0.78 | 2.02 | 3.25 |
| Shape(ε) | -1.01 | -0.53 | -0.05 |
| East |  |  |  |
| Scale(β0) | 0.85 | 1.88 | 2.91 |
| Shape(ε) | -1.13 | -0.65 | -0.18 |

**Table S.4: Pearson and Spearman correlation coefficients in winter minimum temperature between Mongolia data and Siberia data**

|  | Southwest | Northwest | East |
| --- | --- | --- | --- |
| Pearson correlation coefficients |  |  |  |
| Irkutsk, Siberia | 0.57*** | 0.72*** | 0.76*** |
| Ulan-Ude, Siberia | -0.14 | -0.13 | -0.21* |
| Minusinsk, Siberia | -0.04 | -0.09 | -0.16 |
| Spearman correlation coefficients |  |  |  |
| Irkutsk, Siberia | 0.52*** | 0.61*** | 0.60*** |
| Ulan-Ude, Siberia | -0.14 | -0.19 | -0.22* |
| Minusinsk, Siberia | -0.02 | -0.08 | -0.08 |
| Note: One, two or three stars indicate that the corresponding variable is significant at 10%, 5% and 1% levels, respectively. | | | |

Table S.5: Estimated parameters based on the best GEV model fitted to the winter minimum temperature in Southwest using Irkutsk data.

|  | Estimate | Standard Error Estimates |
| --- | --- | --- |
| Southwest |  |  |
| Location (α0) | 11.82 | 1.22 |
| Location (α1) | 0.39 | 0.06 |
| Scale (β0) | 1.90 | 0.14 |
| Shape (ε) | -0.25 | 0.06 |
| Northwest |  |  |
| Location (α0) | 12.67 | 1.00 |
| Location (α1) | 0.52 | 0.05 |
| Scale (β0) | 0.35 | 0.66 |
| Scale (β1) | 0.06 | 0.03 |
| Shape(ε) | -0.18 | 0.06 |
| East |  |  |
| Location (α0) | 10.20 | 0.80 |
| Location(α1) | 0.48 | 0.04 |
| Scale (β0) | 1.40 | 0.10 |
| Shape (ε) | -0.38 | 0.05 |

**Table S.6: Estimated parameters based on the best GPD model fitted to the winter minimum temperature in Southwest using Irkutsk data.**

|  | Estimate | Standard Error Estimates |
| --- | --- | --- |
| Southwest |  |  |
| Scale (β0) | 7.87 | 2e-08 |
| Scale (β1) | -0.21 | 2e-08 |
| Shape(ε) | -1.03 | 2e-08 |
| Northwest |  |  |
| Scale (β1) | -3.66 | 1.22 |
| Scale (β2) | 0.36 | 0.075 |
| Shape(ε) | -0.70 | 0.15 |
| East |  |  |
| Scale (β1) | -1.55 | 2e-08 |
| Scale (β2) | 0.12 | 2e-08 |
| Shape(ε) | -0.78 | 0.038 |
